# Supplementary material for: The Consequences of Replicating in the Wrong Orientation: Bacterial Chromosome Duplication without an Active Replication Origin
Source: PubMed Central journal article supplement (PMC4631800; doi:10.1128/mbio.01294-15), 2015-11-03

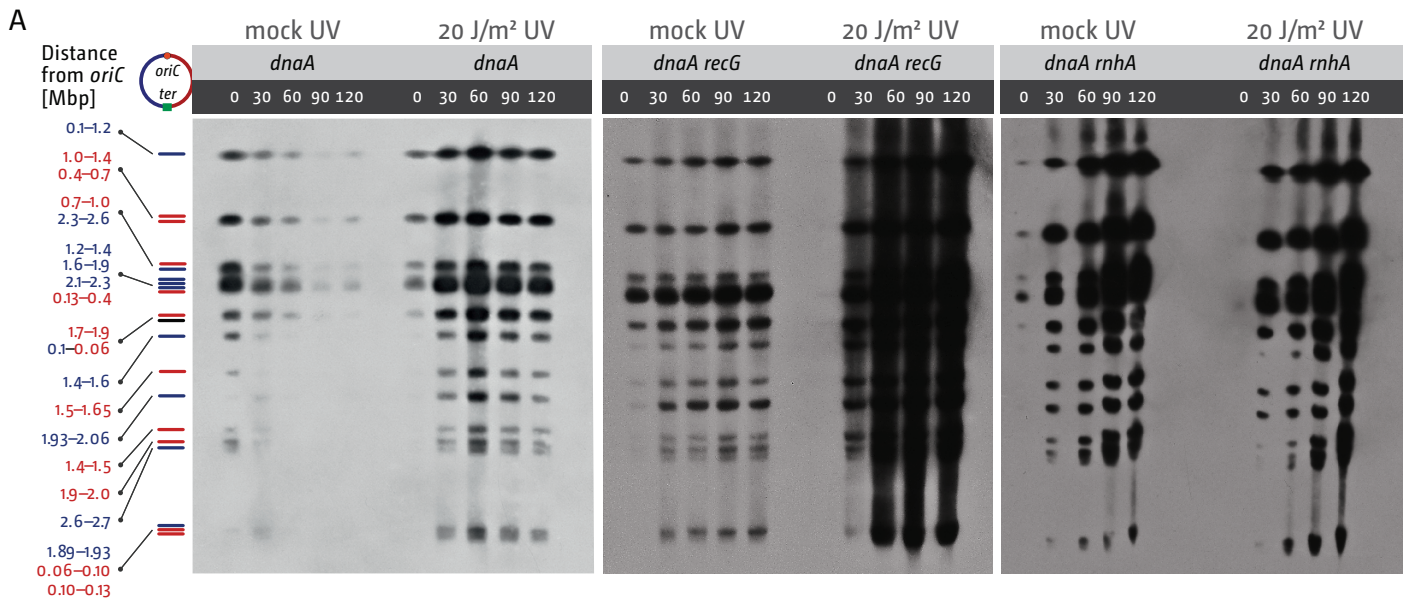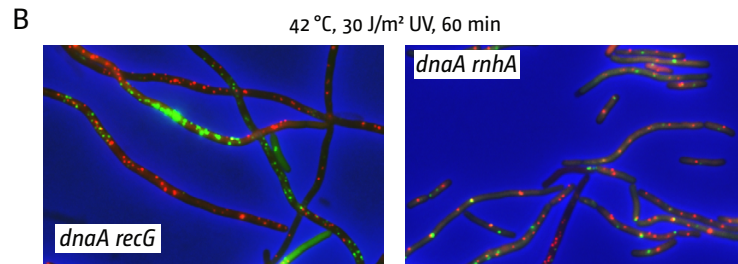

Supplement: mbo005152518sf2.pdf [file mbo005152518sf2.pdf]
